# Supplementary material for: Potential hepatic stem cells reside in EpCAM+ cells of normal and injured mouse liver
Source: Oxford University Press journal article supplement (doi:10.1242/dev.031369), 2009-05-08
Supplement: dev031369-sup-031369-figs1.pdf [file dev031369-sup-031369-figs1.pdf]

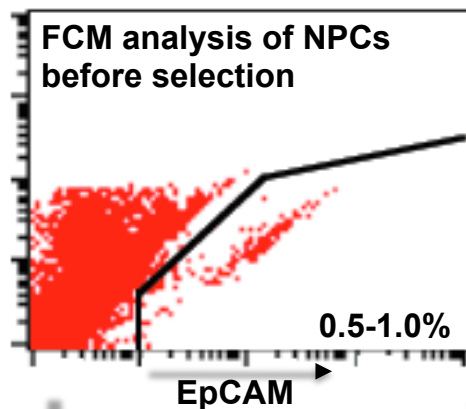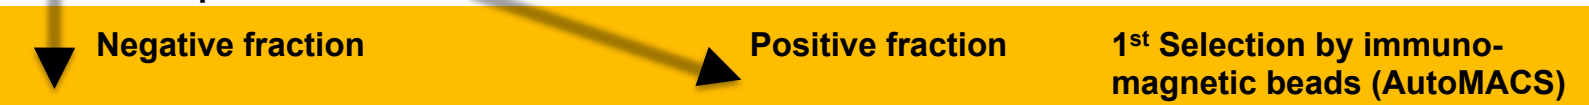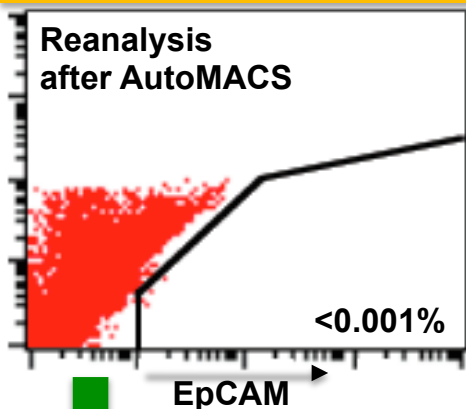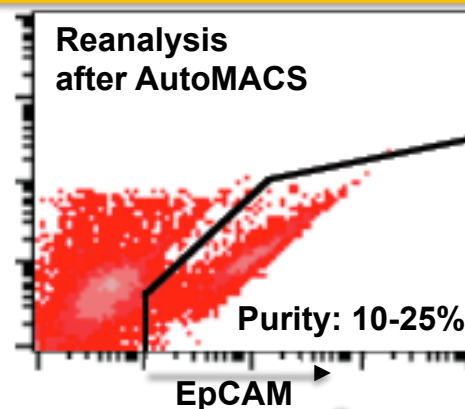

Estimation of the number  
of EpCAM+ cells per a liver

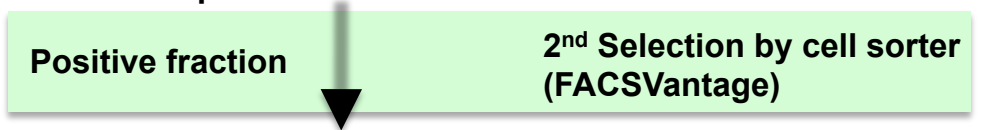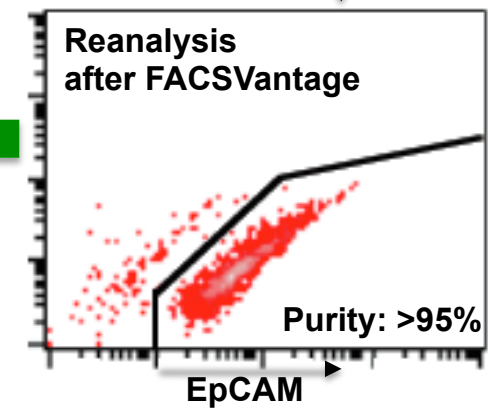

EpCAM- cells      EpCAM+ cells

Analysis of EpCAM+ and EpCAM- cells  
· In vitro colony formation assay
