# Supplementary material for: Potential hepatic stem cells reside in EpCAM+ cells of normal and injured mouse liver
Source: Oxford University Press journal article supplement (doi:10.1242/dev.031369), 2009-05-08
Supplement: dev031369tables1.pdf [file dev031369tables1.pdf]

**Table S1. List of genes identified by the SST method**

| Gene                                                       | Number of clones |
|------------------------------------------------------------|------------------|
| <b>Receptor</b>                                            |                  |
| Lymphatic vessel endothelial hyaluronan receptor 1 (Lyve1) | 20               |
| Scavenger receptor class F member 1 (Scarf1)               | 6                |
| Endothelin receptor type B                                 | 6                |
| Fetal liver kinase 1 (Flk1)                                | 5                |
| Poliovirus receptor-related 2                              | 5                |
| Cd44                                                       | 3                |
| Poliovirus receptor                                        | 3                |
| Neuropilin                                                 | 3                |
| Endothelial protein C receptor                             | 2                |
| Secretin receptor                                          | 2                |
| Cd97                                                       | 2                |
| Brother of CDO                                             | 2                |
| Heparin-binding fibroblast growth factor receptor 2        | 1                |
| Frizzled receptor 4                                        | 1                |
| Gp130                                                      | 1                |
| Scavenger receptor class B member 1 (Scarb1)               | 1                |
| Frizzled receptor 2                                        | 1                |
| FMS-like tyrosine kinase 1 (Flt1)                          | 1                |
| Interferon $\alpha/\beta$ receptor                         | 1                |
| IL10 receptor 2                                            | 1                |
| <b>Adhesion molecule</b>                                   |                  |
| Junctional adhesion molecule                               | 8                |
| Endothelial cell-selective adhesion molecule               | 6                |
| Intercellular adhesion molecule 1                          | 4                |
| Claudin 4                                                  | 4                |
| Integrin $\beta 3$                                         | 2                |
| EpCAM                                                      | 2                |
| Milk fat globule-EFG factor 8 protein                      | 1                |
| Claudin 3                                                  | 1                |
| Carcinoembryonic antigen-related cell adhesion molecule 1  | 1                |
| Integrin $\beta 2$                                         | 1                |
| Immunoglobulin superfamily, member 4                       | 1                |
| <b>Extracellular matrix protein</b>                        |                  |
| Syndecan                                                   | 5                |
| Syndecan 2                                                 | 4                |
| <b>Ligand</b>                                              |                  |
| Delta-like homolog (dlk)/preadipocyte factor 1             | 3                |
| P-selectin glycoprotein ligand precursor                   | 3                |
| Ephrin B1                                                  | 1                |
| <b>Mucin</b>                                               |                  |
| Endomucin 1                                                | 2                |
| Cd164                                                      | 2                |
| Mucin 1                                                    | 1                |
| <b>Others</b>                                              |                  |
| Cd47                                                       | 4                |
| Kangai 1                                                   | 4                |
| Hepatocyte growth factor activator inhibitor type 2        | 3                |
| Aminopeptidase A                                           | 2                |
| Transmembrane 9 superfamily member 1                       | 2                |
| CMRF35-like molecule                                       | 2                |
| TROP2                                                      | 1                |
| Aminopeptidase N                                           | 1                |
| Stromal cell derived factor receptor $\alpha$              | 1                |
| FXYD domain-containing ion transport regulator 5           | 1                |
| Prostaglandin transporter subtype 2                        | 1                |
| Liver-specific zona pellucida domain containing protein    | 1                |
| Uroplakin IIIb                                             | 1                |
| Cysteine-rich motor neuron 1                               | 1                |
| Neural proliferation, differentiation and control gene 1   | 1                |
